# Supplementary material for: Regulation of Sialidase Production in Clostridium perfringens by the Orphan Sensor Histidine Kinase ReeS
Source: PubMed Central journal article supplement (PMC3762733; doi:10.1371/journal.pone.0073525), 2013-09-04
Supplement: pone.0073525.s001.pdf [file pone.0073525.s001.pdf]

**Table S1: Differently regulated genes in the *reeS* mutant.** Microarrays were designed to include all potential protein-coding sequences from the strain 13 genome, including the native plasmid, pCP13 [1,2] and were hybridized with labeled cDNA generated from the wild-type and *reeS* mutant. Fold ratios are expressed as a ratio of *reeS* mutant to wild-type expression.

| <b>Locus Tag</b> | <b>Function</b>                                                              | <b>Fold ratio</b> | <b>FDR</b> |
|------------------|------------------------------------------------------------------------------|-------------------|------------|
| CPE2182          | conserved hypothetical protein                                               | 0.03              | 4.0E-03    |
| PCP06            | probable transposase                                                         | 0.04              | 3.7E-04    |
| CPE1234          | putative hyaluronidase (NagJ)                                                | 0.05              | 3.3E-04    |
| CPE1761          | probable transcription initiation factor SigG                                | 0.05              | 3.3E-04    |
| CPE1343          | probable galactoside ABC transporter (permease protein)                      | 0.05              | 1.8E-03    |
| PCP08            | hypothetical protein                                                         | 0.05              | 3.3E-04    |
| CPE0554          | hypothetical protein                                                         | 0.05              | 3.5E-03    |
| PCP07            | probable ABC transporter                                                     | 0.05              | 9.7E-04    |
| CPE1334          | serine protein kinase                                                        | 0.05              | 1.1E-02    |
| CPE1808          | probable integrase/recombinase                                               | 0.05              | 3.3E-04    |
| CPE1753          | stage IV sporulation protein A                                               | 0.06              | 7.7E-03    |
| CPE1341          | probable galactoside ABC transporter (D-galactose/D-glucose-binding protein) | 0.06              | 1.1E-02    |
| CPE1874          | probable general stress protein                                              | 0.06              | 9.7E-04    |
| CPE0113          | hypothetical protein                                                         | 0.06              | 4.3E-02    |
| CPE1257          | conserved hypothetical protein                                               | 0.08              | 4.0E-03    |
| CPE1667          | probable single-strand binding protein                                       | 0.08              | 2.0E-03    |
| CPE0206          | hypothetical protein                                                         | 0.08              | 2.0E-02    |
| PCP53            | hypothetical protein                                                         | 0.08              | 1.0E-03    |
| CPE0818          | endo-beta-N-acetylglucosaminidase                                            | 0.08              | 9.7E-04    |
| CPE2632          | probable PTS system,, mannose-specific, component IIAB                       | 0.08              | 8.1E-04    |
| CPE0068          | glucose-1-phosphate adenylyltransferase                                      | 0.09              | 1.2E-03    |
| CPE2218          | probable spore coat protein                                                  | 0.09              | 9.6E-03    |
| CPE0886          | hypothetical protein                                                         | 0.09              | 4.0E-03    |
| PCP57            | collagen binding protein (Cna)                                               | 0.09              | 1.0E-02    |
| CPE1142          | hypothetical protein                                                         | 0.09              | 1.9E-03    |
| CPE2288          | prepilin peptidase dependent protein A                                       | 0.10              | 2.4E-02    |
| IGR31            | intergenomic region                                                          | 0.10              | 9.2E-03    |
| CPE2295          | signal peptidase type I                                                      | 0.10              | 4.2E-03    |
| CPE0114          | hypothetical protein                                                         | 0.10              | 1.9E-03    |

|         |                                                                  |      |         |
|---------|------------------------------------------------------------------|------|---------|
| CPE2226 | hypothetical protein                                             | 0.10 | 6.2E-03 |
| CPE1523 | putative hyaluronidase (NagL)                                    | 0.10 | 3.1E-03 |
| CPE2179 | conserved hypothetical protein                                   | 0.11 | 1.2E-03 |
| CPE0069 | glycogen biosynthesis protein (GlgD)                             | 0.11 | 3.1E-02 |
| CPE2263 | hypothetical protein                                             | 0.11 | 4.5E-03 |
| CPE2215 | hypothetical protein                                             | 0.11 | 7.7E-03 |
| CPE2631 | probable PTS system, mannose-specific, component IIC             | 0.11 | 9.8E-03 |
| CPE1949 | hypothetical protein                                             | 0.12 | 2.6E-02 |
| CPE2040 | stage II sporulation protein P                                   | 0.12 | 3.2E-02 |
| CPE0105 | hypothetical protein                                             | 0.12 | 2.3E-02 |
| CPE2630 | probable mannose permease IIm                                    | 0.12 | 6.6E-03 |
| CPE2504 | hypothetical protein                                             | 0.13 | 4.3E-02 |
| PCP50   | hypothetical protein                                             | 0.13 | 2.6E-02 |
| CPE2261 | hypothetical protein                                             | 0.13 | 2.2E-02 |
| PCP35   | hypothetical protein                                             | 0.13 | 9.2E-03 |
| CPE1266 | beta-galactosidase                                               | 0.14 | 4.5E-03 |
| PCP09   | hypothetical protein                                             | 0.14 | 2.1E-02 |
| PCP51   | hypothetical protein                                             | 0.14 | 9.7E-04 |
| CPE1502 | hypothetical protein 10C                                         | 0.14 | 1.9E-03 |
| PCP44   | hypothetical protein                                             | 0.14 | 1.5E-02 |
| CPE2353 | probable spore cortex-lytic enzyme                               | 0.15 | 3.2E-02 |
| CPE0430 | probable type I signal peptidase                                 | 0.15 | 4.2E-03 |
| CPE1875 | conserved hypothetical protein                                   | 0.15 | 2.0E-02 |
| CPE0507 | hypothetical protein                                             | 0.15 | 2.3E-02 |
| CPE1920 | hypothetical protein                                             | 0.15 | 2.8E-02 |
| CPE2146 | hypothetical protein                                             | 0.16 | 1.1E-02 |
| PCP54   | hypothetical protein                                             | 0.16 | 2.0E-03 |
| CPE0578 | probable ABC transporter (permease)                              | 0.16 | 1.2E-02 |
| PCP43   | hypothetical protein                                             | 0.17 | 4.0E-02 |
| CPE2135 | hypothetical protein                                             | 0.18 | 1.8E-02 |
| CPE2050 | anti-sigma F factor antagonist (stage II sporulation protein AA) | 0.18 | 1.5E-02 |
| CPE0576 | probable ABC transporter (binding protein)                       | 0.18 | 1.9E-03 |
| CPE1368 | conserved hypothetical protein                                   | 0.19 | 2.6E-02 |
| PCP36   | hypothetical protein                                             | 0.19 | 6.6E-03 |
| CPE1342 | probable galactoside ABC transporter (ATP-binding protein)       | 0.19 | 9.2E-03 |
| PCP34   | hypothetical protein                                             | 0.20 | 2.5E-02 |
| CPE2049 | anti-sigma F factor antagonist (stage II sporulation protein AB) | 0.20 | 9.2E-03 |
| CPE2473 | stage II sporulation protein E                                   | 0.20 | 9.2E-03 |
| CPE1279 | putative hyaluronidase (NagK)                                    | 0.21 | 5.5E-03 |

|         |                                                      |       |         |
|---------|------------------------------------------------------|-------|---------|
| CPE1251 | hypothetical protein                                 | 0.21  | 9.2E-03 |
| CPE1353 | hypothetical protein                                 | 0.22  | 2.6E-02 |
| CPE1876 | conserved hypothetical protein                       | 0.22  | 2.2E-02 |
| CPE0422 | conserved hypothetical protein                       | 0.22  | 2.8E-02 |
| PCP30   | hypothetical protein                                 | 0.23  | 1.8E-02 |
| CPE0553 | exo-alpha-sialidase (NanJ)                           | 0.23  | 8.1E-02 |
| CPE2445 | conserved hypothetical protein                       | 0.24  | 3.2E-02 |
| CPE1256 | NADPH-dependent butanol dehydrogenase                | 0.24  | 4.9E-02 |
| CPE2649 | conserved hypothetical protein                       | 0.25  | 2.6E-02 |
| PCP33   | conserved hypothetical protein                       | 0.26  | 1.5E-02 |
| PCP60   | conserved hypothetical protein                       | 0.27  | 2.1E-02 |
| PCP55   | potential Spo0A homolog                              | 0.28  | 2.5E-02 |
| IGR111  | intergenomic region                                  | 0.28  | 3.6E-02 |
| CPE0421 | probable glycerophosphoryl diester phosphodiesterase | 0.28  | 1.7E-02 |
| CPE0291 | holo-(acyl-carrier-protein) synthase                 | 0.29  | 9.2E-03 |
| CPE0577 | probable ABC transporter (permease)                  | 0.30  | 4.1E-02 |
| PCP52   | hypothetical protein                                 | 0.30  | 2.1E-02 |
| PCP32   | probable resolvase                                   | 0.30  | 2.7E-02 |
| CPE1663 | conserved hypothetical protein                       | 0.30  | 3.8E-02 |
| CPE0471 | hypothetical protein                                 | 0.32  | 2.6E-02 |
| PCP58   | PemK-like protein                                    | 0.32  | 1.1E-02 |
| CPE2574 | hypothetical protein                                 | 0.33  | 2.1E-02 |
| CPE1362 | conserved hypothetical protein                       | 0.36  | 2.8E-02 |
| CPE1030 | conserved hypothetical protein                       | 0.37  | 2.2E-02 |
| PCP31   | hypothetical protein                                 | 0.38  | 2.1E-02 |
| PCP12   | hypothetical protein                                 | 0.38  | 4.9E-02 |
| CPE2342 | probable maltose ABC transporter (permease protein)  | 0.39  | 2.1E-02 |
| CPE1596 | probable acetylxylan esterase                        | 0.42  | 4.9E-02 |
| CPE2058 | glutamate decarboxylase                              | 2.91  | 2.4E-02 |
| IGR22   | intergenomic region                                  | 10.36 | 4.8E-02 |

## References

1. Shimizu T, Ohtani K, Hirakawa H, Ohshima K, Yamashita A, et al. (2002) Complete genome sequence of *Clostridium perfringens*, an anaerobic flesh-eater. Proc Natl Acad Sci U S A 99: 996-1001.
2. Ohtani K, Hirakawa H, Tashiro K, Yoshizawa S, Kuhara S, et al. (2010) Identification of a two-component VirR/VirS regulon in *Clostridium perfringens*. Anaerobe 16: 258-264.
